# Supplementary material
Source: publisher site journal article supplement (https://www.dovepress.com/article/supplementary_file/624631/Supplementary%20Material_1.docx)
Supplement: Supplementary file 1 [file Supplementary%20Material_1.docx]

# Supplementary materials

# Supplementary file 1: Palliative care services at TASH before and during the MDT intervention, mapped to WHO-recommended palliative care domains

A summary of how each WHO-recommended palliative care domain and indicators that were addressed before and during the MDT intervention is presented in Table S1.

**Table S1: Palliative care services at TASH before and during the MDT intervention, mapped to WHO-recommended palliative care domains**

| **WHO Domain** | **Indicator** | **Usual care/before MDT** | **During MDT intervention** |
| --- | --- | --- | --- |
| **Pain assessment** | Routine pain assessment using a standardized tool | No structured pain assessment system; assessment was informal and inconsistently documented | Routine standardized pain assessment integrated into clinical workflow |
| Documentation and monitoring of pain assessment | Pain recognized as the 5th vital sign but not systematically recorded in patient charts | Routinely documented in all patient records and Systematic reassessment of pain relief at scheduled follow-up |
| **Pain management** | Severity-matched, multimodal, around-the-clock analgesia within whole-person care | No structured and implementation; prescribing was inconsistent | Full implementation of the WHO recommended current severity-matched multimodal analgesia |
| Opioid use when indicated | Limited and non-standardized access | Appropriate opioid use integrated into MDT-guided care and access was ensured in collaboration with others |
| **Non-pain symptom management** | Standardized management of symptoms (e.g., nausea, constipation, dyspnoea) | Fragmented, reactive symptom management | Protocol-based symptom management integrated into care pathways |
| **Multidisciplinary care** | MDT-based patient review | No MDT structure in place | Fully functional MDT reviewing all palliative care patients |
| Individualized care plan development and referral | Not available | Individualized MDT-developed care plans with structured referral to Hospice Ethiopia or Hope Beyond for home-based care |
| **Psychological support** | Psychological support provision | Informal, non-structured support | Structured psychological support integrated into MDT care |
| **Spiritual care** | Assessment of spiritual needs | Not routinely assessed | Systematic spiritual needs assessment implemented |
| Provision of spiritual care | Ad hoc, patient-initiated only | Formal referral pathway to religious/spiritual-care providers established |
| **Integrated palliative care delivery** | Comprehensive palliative care package | No integrated package; care was fragmented | Fully integrated holistic palliative care package delivered through the MDT |

**Note.** Indicators are adapted from the WHO framework for palliative care delivery. MDT = multidisciplinary team; TASH = Tikur Anbessa Specialized Hospital

# Supplementary file 2: Psychometric Validation of the Amharic Version of the EORTC QLQ-C15-PAL in Ethiopian Patients Receiving Palliative Care

**S2.1. Instrument**

The EORTC QLQ-C15-PAL is a 15-item palliative-care-specific health-related quality of life (HRQoL) questionnaire developed by Groenvold et al. (2006) as a shortened, palliative-care-adapted version of the EORTC QLQ-C30. It contains two multi-item functional scales (physical functioning, items 1–3; emotional functioning, items 13–14), two multi-item symptom scales (fatigue, items 7 and 11; pain, items 5 and 12), five single-item symptom measures (dyspnoea, item 4; insomnia, item 6; appetite loss, item 8; nausea/vomiting, item 9; constipation, item 10), and a single-item global quality of life measure (item 15). Items 1–14 use a 4-point Likert response scale (1 = Not at all to 4 = Very much); item 15 uses a 7-point response scale (1 = Very poor to 7 = Excellent). All scale scores are linearly transformed to a 0–100 range following the EORTC scoring manual (Fayers et al., 2001), with higher scores on functional scales and the global quality of life item indicating better status, and higher scores on symptom scales indicating greater symptom burden.

**S2.2. Translation and Cultural Adaptation**

The English version of the EORTC QLQ-C15-PAL was translated into Amharic following the standard EORTC translation procedure. The procedure involved (i) two independent forward translations from English to Amharic by professional bilingual translators with medical background, (ii) reconciliation of the two forward translations by an expert panel comprising palliative care physicians, nurses, and a psychologist, (iii) blind back-translation into English by a bilingual translator unfamiliar with the original instrument, (iv) comparison of the back-translation with the original English version and resolution of discrepancies by the expert panel, and (v) cognitive debriefing with a sample of advanced-illness patients at Tikur Anbessa Specialized Hospital (TASH) to assess comprehensibility, cultural appropriateness, and equivalence of meaning. Items identified as culturally sensitive or linguistically ambiguous during cognitive debriefing were revised and tested again until consensus was reached. The final Amharic version was approved by the expert panel prior to use in the main study.

**S2.3. Sample and Psychometric Procedures**

Validation analyses were conducted on the full baseline sample of adults (N = 192) receiving palliative care at TASH. Psychometric properties assessed comprised (i) acceptability and data quality (missing data, floor and ceiling effects); (ii) internal consistency using Cronbach's alpha for multi-item scales; (iii) convergent validity using Spearman's rank correlations between QLQ-C15-PAL scale scores and the EQ-5D-5L visual analogue scale (EQ-VAS); (iv) known-groups validity comparing scale scores between patients able vs. unable to function, as categorised by ECOG performance status, using Mann-Whitney U tests and one-way ANOVA; (v) dimensionality using exploratory factor analysis (EFA) with principal axis factoring extraction and Promax oblique rotation; and (vi) sensitivity to change (responsiveness), examined through paired-sample comparisons between pre- and post-intervention scores (reported in the main text).

Test-retest reliability was not assessed because the study design did not include a retest subsample within the short clinically stable interval required (typically 2–7 days). This is noted as a limitation of the present psychometric evaluation. All analyses were conducted using IBM SPSS Statistics version 27. Two-tailed p-values were considered statistically significant at p < 0.05.

**S2.4. A Priori Hypotheses**

Following standard psychometric validation practice, we specified the following a priori hypotheses: (1) Cronbach's α would exceed 0.70 for the multi-item functional scales and would be acceptable (≥ 0.60) for short 2-item symptom scales; (2) QLQ-C15-PAL global quality of life would correlate positively with EQ-VAS (r > 0.5), supporting convergent validity; (3) QLQ-C15-PAL functional scales would correlate positively and symptom scales negatively with EQ-VAS; (4) patients classified as "not able to function" on ECOG would report worse scores on all QLQ-C15-PAL scales than patients "able to function", supporting known-groups validity; and (5) EFA would reveal a factor structure broadly consistent with the theoretical physical/emotional/symptom domains of the instrument, with items 1–3 loading together and items 13–14 loading together as distinct factors.

**Supplementary Results**

**S2.5. Acceptability and Data Quality**

Completion rates at baseline were excellent. Fourteen of the fifteen items were completed by all 192 participants (0% missing), and one item (constipation, item 10) was completed by 191 participants (0.5% missing). The full 14-item inventory (excluding the global quality of life item) was completed by 191 of 192 participants (99.5% complete cases). These rates indicate high acceptability and feasibility of the Amharic version in this clinical setting (Table S2).

**Table S2: Item-level response distribution and missing data (N = 192)**

| **Item** | **Mean** | **SD** | **Min** | **Max** | **N valid** | **N missing (%)** |
| --- | --- | --- | --- | --- | --- | --- |
| Q1 — Trouble taking a short walk | 2.59 | 1.00 | 1 | 4 | 192 | 0 (0.0%) |
| Q2 — Need to stay in bed or chair | 2.45 | 1.00 | 1 | 4 | 192 | 0 (0.0%) |
| Q3 — Need help (eating, dressing, washing) | 2.40 | 1.08 | 1 | 4 | 192 | 0 (0.0%) |
| Q4 — Were you short of breath? | 2.04 | 1.02 | 1 | 4 | 192 | 0 (0.0%) |
| Q5 — Have you had pain? | 2.78 | 0.94 | 1 | 5 | 192 | 0 (0.0%) |
| Q6 — Have you had trouble sleeping? | 2.41 | 1.06 | 1 | 4 | 192 | 0 (0.0%) |
| Q7 — Have you felt weak? | 2.87 | 0.93 | 1 | 5 | 192 | 0 (0.0%) |
| Q8 — Have you lacked appetite? | 2.55 | 1.09 | 1 | 5 | 192 | 0 (0.0%) |
| Q9 — Have you felt nauseated? | 2.16 | 1.05 | 1 | 4 | 192 | 0 (0.0%) |
| Q10 — Have you been constipated? | 1.97 | 1.08 | 1 | 4 | 191 | 1 (0.5%) |
| Q11 — Were you tired? | 2.70 | 0.92 | 1 | 4 | 192 | 0 (0.0%) |
| Q12 — Did pain interfere with daily activities? | 2.84 | 0.96 | 1 | 4 | 192 | 0 (0.0%) |
| Q13 — Did you feel tense? | 2.48 | 1.05 | 1 | 4 | 192 | 0 (0.0%) |
| Q14 — Did you feel depressed? | 2.56 | 1.10 | 1 | 5 | 192 | 0 (0.0%) |
| Q15 — Overall quality of life (1–7) | 3.91 | 1.25 | 1 | 6 | 192 | 0 (0.0%) |

Items 1–14 use a 4-point scale (1 = Not at all to 4 = Very much). Item 15 uses a 7-point scale (1 = Very poor to 7 = Excellent). A small proportion of responses (five items) are recorded at value 5 for some items; these reflect data-entry variation and were treated as missing during scoring per the EORTC scoring manual (only responses within the validated range contribute to scale scores).

Floor effects (score = 0 indicating best possible status on symptom scales and worst possible on functional scales) and ceiling effects (score = 100 indicating worst possible status on symptom scales and best possible on functional scales) were within acceptable limits (< 20%) for most scales (Table S3). Notable floor effects were observed for nausea/vomiting (34.9%), dyspnoea (37.5%), insomnia (25.0%), and constipation (46.1%), reflecting the high prevalence of symptom-free responses for these specific symptoms in the sample. No scale showed problematic ceiling effects that would compromise responsiveness, with the exception of constipation (ceiling 13.1%) and nausea/vomiting (13.5%), which remained within acceptable bounds.

**Table S3: Floor and ceiling effects on scale scores (baseline, N = 192)**

| **Scale** | **N** | **Floor effect (score = 0)** | **Ceiling effect (score = 100)** |
| --- | --- | --- | --- |
| Physical functioning | 192 | 10.4% | 8.9% |
| Emotional functioning | 192 | 18.2% | 18.2% |
| Fatigue | 192 | 3.1% | 13.5% |
| Pain | 192 | 1.6% | 16.7% |
| Nausea/vomiting | 192 | 34.9% | 13.5% |
| Dyspnoea | 192 | 37.5% | 12.0% |
| Insomnia | 192 | 25.0% | 18.8% |
| Appetite loss | 191 | 22.0% | 23.0% |
| Constipation | 191 | 46.1% | 13.1% |
| Global quality of life | 192 | 1.6% | 0.0% |

Floor effect = percentage of respondents scoring at the minimum of the scale (0); Ceiling effect = percentage scoring at the maximum (100). For functional scales and global quality of life, 0 represents worst status; for symptom scales, 0 represents absence of symptom (best status). Values above 15% are generally considered notable. Most scales demonstrated floor/ceiling effects within acceptable limits for a heterogeneous advanced-illness population.

**S2.6. Internal Consistency**

Cronbach's alpha for the two multi-item functional scales demonstrated excellent internal consistency: α = 0.864 for physical functioning (3 items) and α = 0.913 for emotional functioning (2 items). For the 2-item symptom scales, α = 0.681 for fatigue (items 7 and 11) and α = 0.648 for pain (items 5 and 12), values considered acceptable for short scales in clinical populations. The overall 14-item instrument yielded α = 0.877, indicating strong internal consistency (Table S4). All inter-item correlations were positive, and removal of any single item would have minimally changed the overall alpha (range 0.864 to 0.879), indicating no redundant or poorly fitting items.

**Table S4: Internal consistency (Cronbach's alpha) for multi-item scales (N = 192)**

| **Scale (items)** | **k items** | **N** | **Cronbach's α** | **Corrected item-total r** | **α if item deleted** |
| --- | --- | --- | --- | --- | --- |
| Physical functioning (items 1, 2, 3) | 3 | 192 | 0.864 | 0.735–0.750 | 0.800–0.816 |
| Emotional functioning (items 13, 14) | 2 | 192 | 0.913 | 0.841 | — |
| Fatigue (items 7, 11) | 2 | 192 | 0.681 | 0.516 | — |
| Pain (items 5, 12) | 2 | 192 | 0.648 | 0.479 | — |
| Overall QLQ-C15-PAL (items 1–14) | 14 | 191 | 0.877 | 0.316–0.632 | 0.864–0.879 |

Values are Cronbach's alpha (with internally standardised item-total correlations and alpha-if-deleted for multi-item scales with ≥ 3 items). For 2-item scales, a single item-total correlation is reported. An alpha of ≥ 0.70 is conventional for multi-item functional scales; shorter (2-item) scales commonly show lower alphas and the EORTC expects such values to be slightly lower than for longer scales. All multi-item scales met or approached the acceptable threshold.

**S2.7. Convergent Validity**

Spearman correlations between QLQ-C15-PAL scale scores and the EQ-VAS were in the expected directions and magnitudes (Table S5). The strongest correlation was observed between QLQ-C15-PAL global quality of life and EQ-VAS (ρ = 0.873, p < 0.001), providing strong evidence of convergent validity between these two overall health-rating measures. Physical functioning (ρ = 0.623) and emotional functioning (ρ = 0.507) correlated moderately-to-strongly and positively with EQ-VAS, as hypothesised. Symptom scales correlated negatively with EQ-VAS, with pain (ρ = −0.573), insomnia (ρ = −0.461), fatigue (ρ = −0.450), and appetite loss (ρ = −0.414) showing moderate-to-strong associations, and nausea/vomiting (ρ = −0.359), dyspnoea (ρ = −0.265), and constipation (ρ = −0.235) showing weaker but statistically significant associations. All hypotheses regarding the direction and approximate magnitude of correlations were confirmed.

**Table S5: Convergent validity: Spearman correlations of QLQ-C15-PAL scales with the EQ-VAS (baseline, N = 192)**

| **QLQ-C15-PAL scale** | **Spearman's ρ** | **p-value** | **Hypothesis test** |
| --- | --- | --- | --- |
| ***Functional scales (higher = better)*** | | | |
| Physical functioning | +0.623 | < 0.001 | Positive, strong — as hypothesised |
| Emotional functioning | +0.507 | < 0.001 | Positive, moderate–strong — as hypothesised |
| ***Symptom scales (higher = worse)*** | | | |
| Fatigue | −0.450 | < 0.001 | Negative, moderate; as hypothesized |
| Pain | −0.573 | < 0.001 | Negative, strong; as hypothesized |
| Nausea/vomiting | −0.359 | < 0.001 | Negative, moderate; as hypothesized |
| Dyspnoea | −0.265 | < 0.001 | Negative, weak–moderate; as hypothesized |
| Insomnia | −0.461 | < 0.001 | Negative, moderate; as hypothesized |
| Appetite loss | −0.414 | < 0.001 | Negative, moderate; as hypothesized |
| Constipation | −0.235 | = 0.001 | Negative, weak; as hypothesized |
| ***Global quality of life*** | | | |
| Global QoL (item 15) | +0.873 | < 0.001 | Positive, very strong; as hypothesized |

Spearman's rank correlations with the EQ-5D visual analogue scale (EQ-VAS; 0 = worst imaginable health to 100 = best imaginable health). Sample sizes range from 191 to 192 due to one missing value on constipation and appetite loss items. All correlations were in the hypothesized direction and statistically significant at p < 0.05.

**S2.8. Known-Groups Validity**

All QLQ-C15-PAL scales except insomnia discriminated between patients able to function (ECOG 0–1; n = 48) and patients unable to function (ECOG 2–4; n = 144) in the hypothesized direction (Table S6). Mann-Whitney U tests showed statistically significant between-group differences for physical functioning (Z = −6.10, p < 0.001), global quality of life (Z = −5.38, p < 0.001), emotional functioning (Z = −3.78, p < 0.001), pain (Z = −3.61, p < 0.001), appetite loss (Z = −3.21, p = 0.001), constipation (Z = −2.55, p = 0.011), dyspnoea (Z = −2.54, p = 0.011), fatigue (Z = −2.42, p = 0.015), and nausea/vomiting (Z = −2.19, p = 0.029). Insomnia showed the hypothesized direction but did not reach statistical significance (Z = −1.38, p = 0.167), consistent with insomnia being a symptom not strongly linked to performance status. The effect sizes (eta-squared) ranged from 0.010 (insomnia) to 0.188 (physical functioning), with physical functioning, global quality of life, emotional functioning, pain, and appetite loss demonstrating medium-to-large effects, confirming the scales' sensitivity to clinically meaningful group differences.

**Table S6: Known-groups validity by ECOG performance status (baseline, N = 192)**

| **Scale** | **n₁** | **Mean (SD), able to function** | **n₂** | **Mean (SD), unable to function** | **Z** | **p-value** | **η²** |
| --- | --- | --- | --- | --- | --- | --- | --- |
| ***Functional scales (higher = better)*** | | | | | | | |
| Physical functioning | 48 | 73.38 (22.54) | 144 | 43.06 (28.82) | −6.10 | < 0.001 | 0.188 |
| Emotional functioning | 48 | 65.63 (33.05) | 144 | 43.87 (33.26) | −3.78 | < 0.001 | 0.075 |
| ***Symptom scales (higher = worse)*** | | | | | | | |
| Fatigue | 48 | 52.08 (22.97) | 144 | 62.04 (27.48) | −2.42 | = 0.015 | 0.026 |
| Pain | 48 | 47.92 (27.64) | 144 | 64.58 (25.84) | −3.61 | < 0.001 | 0.071 |
| Nausea/vomiting | 48 | 29.86 (35.89) | 144 | 41.67 (34.48) | −2.19 | = 0.029 | 0.021 |
| Dyspnoea | 48 | 24.31 (30.55) | 144 | 38.19 (34.36) | −2.54 | = 0.011 | 0.032 |
| Insomnia | 48 | 40.97 (35.22) | 144 | 49.07 (35.25) | −1.38 | = 0.167 | 0.010 |
| Appetite loss | 48 | 36.81 (32.43) | 143 | 55.94 (35.74) | −3.21 | = 0.001 | 0.054 |
| Constipation | 47 | 20.57 (29.94) | 144 | 36.11 (36.87) | −2.55 | = 0.011 | 0.035 |
| ***Global quality of life*** | | | | | | | |
| Global QoL | 48 | 62.15 (19.37) | 144 | 43.87 (19.19) | −5.38 | < 0.001 | 0.146 |

Group 1 = patients able to function (ECOG 0–1); Group 2 = patients unable to function (ECOG 2–4). Z = Mann-Whitney U test standardized statistic; η² = eta-squared effect size (from one-way ANOVA). η² interpretation: ≈ 0.01 = small, ≈ 0.06 = medium, ≈ 0.14 = large (Cohen, 1988). All scales except insomnia discriminated significantly between groups in the hypothesized direction.

**S2.9. Dimensionality (Exploratory Factor Analysis)**

The Kaiser-Meyer-Olkin measure of sampling adequacy was 0.843 (indicating "meritorious" sampling adequacy), and Bartlett's test of sphericity was highly significant (χ²(91) = 1165.59, p < 0.001), supporting the appropriateness of factor analysis. Principal axis factoring with Promax oblique rotation extracted four factors with eigenvalues > 1, accounting for 65.9% of the total variance (Table S7). The pattern matrix revealed an interpretable factor structure: Factor 1 (physical functioning) loaded on items 1–3 (walking, bed/chair, self-care; loadings 0.766–0.852); Factor 2 (emotional functioning) loaded on items 13–14 (tense, depressed; loadings 0.902–0.942); Factor 3 (general symptom / fatigue) loaded primarily on items 11 (tired, 0.781), 7 (weak, 0.744), 5 (pain, 0.408), 6 (sleeping, 0.396), and 4 (dyspnoea, 0.388); and Factor 4 (gastrointestinal symptom) loaded on items 9 (nauseated, 0.824), 10 (constipated, 0.674), and 8 (appetite loss, 0.586).

A confirmatory 2-factor extraction restricted to the five functional items (PreQ1, PreQ2, PreQ3, PreQ13, PreQ14) provided strong support for the hypothesized two-factor structure: KMO = 0.690, Bartlett's χ²(10) = 527.91, p < 0.001; the two extracted factors accounted for 84.2% of total variance, with physical items loading cleanly on Factor 1 (0.793–0.852) and emotional items loading cleanly on Factor 2 (0.908–0.925), and minimal cross-loadings. The inter-factor correlation was moderate (r = 0.378), consistent with the theoretical expectation that physical and emotional functioning represent related but distinct HRQoL domains.

**Table S7: Exploratory factor analysis of QLQ-C15-PAL items (baseline, N = 192)**

| **Item** | **Factor 1** | **Factor 2** | **Factor 3** | **Factor 4** |
| --- | --- | --- | --- | --- |
| ***Factor 1 — Physical functioning*** | | | | |
| Q2 — Need to stay in bed or chair | 0.852 | — | — | — |
| Q1 — Trouble taking a short walk | 0.815 | — | — | — |
| Q3 — Need help (eating, dressing, etc.) | 0.766 | — | — | — |
| ***Factor 2 — Emotional functioning*** | | | | |
| Q13 — Did you feel tense? | — | 0.942 | — | — |
| Q14 — Did you feel depressed? | — | 0.902 | — | — |
| ***Factor 3 — Fatigue / general symptoms*** | | | | |
| Q11 — Were you tired? | — | — | 0.781 | — |
| Q7 — Have you felt weak? | — | — | 0.744 | — |
| Q5 — Have you had pain? | — | — | 0.408 | — |
| Q6 — Have you had trouble sleeping? | — | — | 0.396 | — |
| Q4 — Were you short of breath? | — | — | 0.388 | — |
| ***Factor 4 — Gastrointestinal symptoms*** | | | | |
| Q9 — Have you felt nauseated? | — | — | — | 0.824 |
| Q10 — Have you been constipated? | — | — | — | 0.674 |
| Q8 — Have you lacked appetite? | — | — | — | 0.586 |
| ***Unallocated*** | | | | |
| Q12 — Did pain interfere with daily activities? | — | — | — | — |

Pattern matrix loadings ≥ 0.30 are shown; loadings below 0.30 are indicated as "—". Four factors with eigenvalues > 1 were extracted, accounting for 65.9% of the total variance (individual factor variances: 39.1%, 10.6%, 8.3%, 7.9%). Item Q12 (pain interference) did not load above 0.30 on any single factor in the rotated pattern matrix, although its structure-matrix correlations were moderate across Factors 1 (0.483) and 2 (0.449), suggesting shared variance with both physical and emotional functioning. The overall 4-factor solution broadly supports the theoretical structure of the instrument, with items 1–3 and 13–14 forming clean Physical and Emotional Functioning factors, respectively. A supplementary forced 2-factor solution restricted to items 1, 2, 3, 13, 14 produced clean separation of the physical and emotional factors (Factor 1 loadings 0.793–0.852 for items 1–3; Factor 2 loadings 0.908–0.925 for items 13–14; inter-factor correlation r = 0.378), providing strong confirmation of the a priori 2-factor functional structure. Sampling adequacy: Kaiser-Meyer-Olkin (KMO) = 0.843; Bartlett's test of sphericity χ²(91) = 1165.59, p < 0.001. Extraction: principal axis factoring. Rotation: Promax (κ = 4).

**S2.10. Responsiveness**

Responsiveness was evaluated through paired pre/post-intervention comparisons among the 167 patients who completed both assessments. All 10 QLQ-C15-PAL scales showed statistically significant change in the direction hypothesized for the MDT palliative care intervention, with effect sizes ranging from small (Constipation, d = −0.19) to large (Global Quality of Life, d = 0.89). Full responsiveness results are reported in the main text (Table 5).

**S2.11. Summary**

The Amharic version of the EORTC QLQ-C15-PAL demonstrated good-to-excellent psychometric properties in the Ethiopian palliative care population studied, with high completion rates, acceptable internal consistency, strong evidence of convergent validity against the EQ-VAS, confirmation of known-groups differences by ECOG performance status on nine of ten scales, a factor structure consistent with the theoretical physical and emotional functioning domains, and demonstrated sensitivity to change following MDT intervention. These findings support the use of the Amharic QLQ-C15-PAL as a valid and reliable patient-reported outcome measure for Ethiopian palliative care research and clinical practice. Test-retest reliability was not assessed and should be examined in future studies.
